# Supplementary material
Source: PubMed Central journal article supplement (PMC1626622)
Supplement: plntcell_tpc.106.046169_1.pdf [file plntcell_tpc.106.046169_1.pdf]

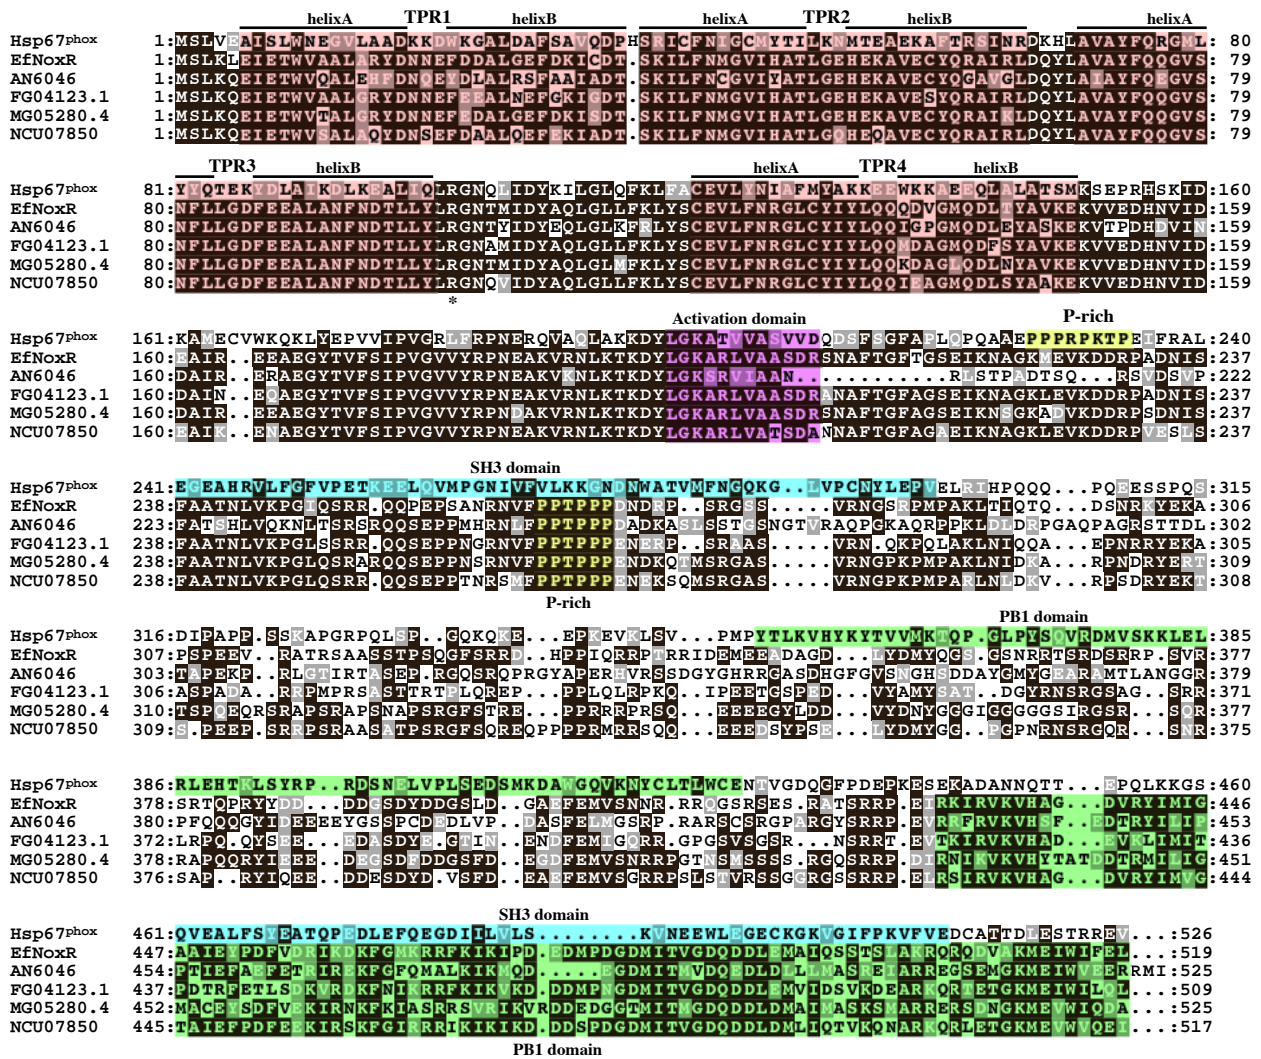

**Supplemental Figure 1.** Alignment of Deduced Fungal NoxR sequences with Vertebrate p67phox and NOXA1 sequences.
