# Supplementary material
Source: PubMed Central journal article supplement (PMC1626622)
Supplement: plntcell_tpc.106.046169_2.pdf [file plntcell_tpc.106.046169_2.pdf]

|       |           | A G                                                                                   |               |                |
|-------|-----------|---------------------------------------------------------------------------------------|---------------|----------------|
| Rac   | EfRac1    | 1:MAQPGWQSIKCVVTGDGAVGKTCLLISYTTNAFPGEYIPTVFDNYSANVMVDGKPIELGLWDTAGQEDYDRLRPLSYPT:    | 80            |                |
|       | FG08857.1 | 1:MAQPGWQSIKCVVTGDGAVGKTCLLISYTTNAFPGEYIPTVFDNYSANVMVDGKPIELGLWDTAGQEDYDRLRPLSYPT:    | 80            |                |
| Cdc42 | HsRac1    | 1:.....MQAIKCVVVG DGAVGKTCLLISYTTNAFPGEYIPTVFDNYSANVMVDGKPVNLGLWDTAGQEDYDRLRPLSYPT:   | 75            |                |
|       | HsRac2    | 1:.....MQAIKCVVVG DGAVGKTCLLISYTTNAFPGEYIPTVFDNYSANVMVDGKPVNLGLWDTAGQEDYDRLRPLSYPT:   | 75            |                |
| Cdc42 | FG05447.1 | 1:..MAVVAITIKCVVVG DGAVGKTCLLISYTTNKFPSSEYVPTVFDNYAVTVMIGDEPYTLGLFDTAGQEDYDRLRPLSYPT: | 78            |                |
|       | HsCdc42   | 1:.....MQTIKCVVVG DGAVGKTCLLISYTTNKFPSSEYVPTVFDNYAVTVMIGDEPYTLGLFDTAGQEDYDRLRPLSYPT:  | 75            |                |
|       | ScCdc42   | 1:.....MQTIKCVVVG DGAVGKTCLLISYTTNKFPSSEYVPTVFDNYAVTVMIGDEPYTLGLFDTAGQEDYDRLRPLSYPT:  | 75            |                |
|       |           |                                                                                       |               |                |
|       |           | G1 (P-loop)                                                                           | G2 (switch I) | G3 (switch II) |
| Rac   | EfRac1    | 81:DVFLICFSLVSPPSFENVKAKWPEIDHHPNIPIILVGTQLDLRDEATLDSLROKRMPEVSYEQALACAKEIKAVKYL:     | 160           |                |
|       | FG08857.1 | 81:DVFLICFSLVSPPSFENVKAKWPEIDHHPNIPIILVGTQLDLRDEASTLDSLROKRMPEVSYEQALACAKEIKAVKYL:    | 160           |                |
| Cdc42 | HsRac1    | 76:DVFLICFSLVSPASFENVRKAWPEVRHHCPNTPIILVGTQLDLRDDDTIEKLKPKKLPITYPQGLAMAKETGAVKYL:     | 155           |                |
|       | HsRac2    | 76:DVFLICFSLVSPASFENVRKAWPEVRHHCPSTPIILVGTQLDLRDDDTIEKLKPKKLPITYPQGLALAKETDSVKYL:     | 155           |                |
| Cdc42 | FG05447.1 | 79:DVFLICFSLVSPASFENVRKAWPEVRHHCPGVPCLLVGTQLDLRDDPSVREKLSKQKQOPVREEDGERLAKDTGAVKY:    | 158           |                |
|       | HsCdc42   | 76:DVFLICFSLVSPSSFENVKAKWPEIDHHPNIPPIILVGTQLDLRDDPSVREKLSKQKQKPIPTPETAEKLARDIKAVKY:   | 155           |                |
|       | ScCdc42   | 76:DVFLICFSLVSPSSFENVKAKWPEIDHHPNIPPIILVGTQLDLRDDPSVREKLSKQKQKPIPTPETAEKLARDIKAVKY:   | 155           |                |
|       |           |                                                                                       |               |                |
|       |           | G4                                                                                    |               |                |
| Rac   | EfRac1    | 161:EC SALTQRNLKSVFDEAIRAVLNPRPQPS.KKKSKCSIL:                                         | 199           |                |
|       | FG08857.1 | 161:EC SALTQRNLKSVFDEAIRAVLNPRPTPS.KKKSKCSIL:                                         | 199           |                |
| Cdc42 | HsRac1    | 156:EC SALTQRGLKTVFDEAIRAVLCPPTPK...KRRKCLL:                                          | 192           |                |
|       | HsRac2    | 156:EC SALTQRGLKTVFDEAIRAVLCPPTPK...QKRACSIL:                                         | 192           |                |
| Cdc42 | FG05447.1 | 159:EC SALTQYKLDVDFDEAIRALEPPAPKKK...SKCLVL:                                          | 195           |                |
|       | HsCdc42   | 156:EC SALTQRGLKTVFDEAIRALEPPETOP...KRRKCLF:                                          | 191           |                |
|       | ScCdc42   | 156:EC SALTQRGLKTVFDEAIRALEPPVTKK...SKCAL:                                            | 191           |                |
|       |           |                                                                                       |               |                |
|       |           | G5                                                                                    |               |                |

**Supplemental Figure 2.** Comparison of Amino Acid Sequences of Human, Fungal and Yeast Rac and Cdc42 Proteins.
