# Supplementary material
Source: PubMed Central journal article supplement (PMC1626622)
Supplement: plntcell_tpc.106.046169_3.pdf [file plntcell_tpc.106.046169_3.pdf]

CLUSTAL X (1.8) multiple sequence alignment

```

MG05280.4      -----MSLKQEIETWVTALGRYDN--NEFEDALGEFDKISDT-SKILFNMGVI
NCU07850      -----MSLKQEIETWVSALAQYDN--SEFDAALQEFEKIADT-SKILFNMGVI
EfNoxR        -----MSLKLEIETWVAALARYDN--NEFDDALGEFDKICDT-SKILFNMGVI
FG04123.1     -----MSLKQEIETWVAALGRYDN--NEFEEALNEFGKIGDT-SKILFNMGVI
AN6046        -----MSLKQEIETWVQALEHFDN--QEYDLALRSFAAIADT-SKILFNCGVI
Hs NP_000424   -----MSLVEAISLWNEGVLAADK--KDWKGALDAFSAVQDPHSR ICFNIGCM
Bt AAC82463   -----MSLAEAISLWNEGVLAADK--KDWKGALDAFTGVQDPHSR ICFNVGCI
Mm NP_035007   -----MSLAEAIRLWNEGVLAADK--KDWKGALEAFSEVQDPHSR ICFNIGCV
Gg XP_422288   -----MSLVETIRLWQEGVCAADG--KEWGAALKAF TAVQNPPAK ICFNIGCT
Xt NP_001029119 -----MALVEIMRLWSEGVAAAEN--EDWNGALKSFTSITDPRS K ICFNIGCC
Dr XP_690944   -----MSFVAPXRQWDEAVACVEQ--RDPDAALRI FL SIEEKNSK IAFNIGCL
Tr BAC79221    -----MSFLDTLQWQDKASTVADR--QEFSEALEI FL SIEEPNSK IYFNIGCL
Hs AAI10841    -----MASLGDLVRAWHLGAQAVDR--GDWARALHLFSGVPAPPAR LCFNAGCV
Mm AAN75143    -----MSSLGDQIRDWHRGVLAVAR--EDWDSALCFFS DVREPLARMY FNRGCV
Bt XP_601452   MTESSTLHTACVPEGPQKKPGSRIVQANGDDYRKQDKRVS L VLSGHSARVLT LNLGQT
Gg XP_415555   -----MAYRELLRRWHQAALAADG--GDWDAALET LCGIEEPPAR ICFN----
Xt NP_001005801 -----MHYKEVVRRWHEGVVAAEG--KDYDAALRSFTAIEDPPSR IWFNVGGI
Dd AAO72634    -----MLKQTIKKNWQSIERYES--GNVGEALTILTSIEQSTSK INYNIGMV

```

```

MG05280.4      HATLGEHEKAVECYQRAIKLDQYLAVAYFQQGVSNFLLGDFE EALANFN D TLLYL RGN TM
NCU07850      HATLGEHEKAVECYQRAIRLDQYLAVAYFQQGVSNFLLGDFE EALANFN D TLLYL RGN QV
EfNoxR        HATLGEHEKAVECYQRAIRLDQYLAVAYFQQGVSNFLLGDFE EALANFN D TLLYL RGN TM
FG04123.1     HATLGEHEKAVESYQRAIRLDQYLAVAYFQQGVSNFLLGDFE EALANFN D TLLYL RGN AM
AN6046        YATLGEHEKAVECYQGA VGLDQYLAIAYFQEGVSNFLLGDFE EALANFN D TLLYL RGN TY
Hs NP_000424   YTILKNMTEAEKAFTRSINRDKHLAVAYFQRGMLYYQTEKYDLAIKDLKEAL IQLRGNQL
Bt AAC82463   YTILGNLPEAEKAF TKSINRDKHLAVSYFQRGMLYYQMEKYDSA I KDLKEAL TQLRGNQL
Mm NP_035007   NTILENLQAAEQAF TKSINRDKHS AVAYFQRGMLYYRMEKYDLAIKDLKEAL TQLRGNQL
Gg XP_422288   HLVLGQLAEAEFA TQSI CDKHLAVAYFQRGT V FYKRHNHEMALKDFKEAL AQLRGNQL
Xt NP_001029119 HLVLGDLEKAEKAF TLTIERDMHLAVGYFQRGFVFFQRGKYS LALKDWTRAY TEMRGNL
Dr XP_690944   CLNNSDLDEAEKAF DSGSIGKDEHLAVAFFQRGVTFYKKEKFEESL LDFQQA FQLRGNQL
Tr BAC79221    HLLNEDLKD AEKAF DSSICKDEHLAVAFFQRAITFYKMTRYEESLAD FQQT LKELRGNQL
Hs AAI10841    HLLAGDPEAALRAF DQAVTKDTCMAVGFQRGVANFQLARFQEALSDFWLAL EQLRGHAA
Mm AAN75143    HLMAGDPEAALRAF DQAVTKDTCMAVGF LQRGVANFQLQR FQEA VSD FQLAL AQLRDN AV
Bt XP_601452   QLNK---PPLSQAF DQAVTKDACLAVGF LQRGVANFQLER FMEALSDFQRTLAQLRDN TA
Gg XP_415555   -----AFDETVMKDNSLAVGYFQRGFVCLQLEMYE EALS DYHMAF SHLRKNPF
Xt NP_001005801 YLLRGDLPRALEAYDKSLAQDCLAVGY YQRGYLQFKLGRYEKALS DCHLALSNLRNNSF
Dd AAO72634    YIKSNFRNAIEYFNRSVEQDKYLASSY YMRAIAHMMNGELNHAI VDYDETI SKLRGHEY

```

```

MG05280.4      IDY AQLGLMFKLYSCEVLFN RGLCYIYLQQKDAGLQDLN YAVKEKVVEDHN-VIDDAIRE
NCU07850      IDY AQLGLL FFKLYSCEVLFN RGLCYIYLQQIEAGMQDLSYAAKEKVVEDHN-VIDEAIKE
EfNoxR        IDY AQLGLL FFKLYSCEVLFN RGLCYIYLQQQDVMQD LTYAVKEKVVEDHN-VIDEAIKE
FG04123.1     IDY AQLGLL FFKLYSCEVLFN RGLCYIYLQQMDAGMQD FSYAVKEKVVEDHN-VIDDAINE
AN6046        IDYEQ LGLKFRLYSCEVLFN RGLCYIYLQQIGPGMQD LEYASKEKVTPDHD-VINDAIRE
Hs NP_000424   IDYKILGLQFKLFACEVLYNIAFMYAKKEEWKKAEEQLALATSMKSEPRHS-KIDKAMEC
Bt AAC82463   IDYKILGLQFKLFACEVLYNIAFMYAKREEWKKAEEHLALAVSMKSEPRHS-KIDRAMES
Mm NP_035007   IDYKILGLQFKLFACEVLYNIALMHAKKEEWKKAEEQLALATNMKSEPRHS-KIDKAMES
Gg XP_422288   IDYKILGLR YRLFAC EILYNI ALVYATMENWKKAE EHLT LAMSSKSE PQHN-KIDRAMEA
Xt NP_001029119 IDYKILGLIFKLYSCEILHNIALTHAKEGKWAKEESILLALSQKVELRHNTKLEKAMED
Dr XP_690944   IDYTP LGLRYKLYACEV LHNIGLAQAQLGKWEKAQENLLTALSLRADAKFS-HIDHALDA
Tr BAC79221    IDY GALGLRYKLNACEV LHNIALTEAQM GHWEKAQESLVKALDYRTE SKLG-IIDNALQA
Hs AAI10841    IDY TQ LGLR FKLQAW EVLHN VASAQCQLGLWTEAASSLREAMSKWPEGS LN-GLDSALDQ
Mm AAN75143    IDY TQ LGLN FKLQAW EVLYNMASAQCQAGLWTKAANTLVEAISKWPEGAQD-ILDIAMDK
Bt XP_601452   IDY TQ LGLR FKLQAW EVLFNMAAVQS QLGLWAEAAACSLGDAISKGPEGAR N-GLDVALGQ
Gg XP_415555   IDYKQLGLRHILYAW EVLYSTAATQCRLQQWQEARDTLEKAVVWRPEGRSA-TLALALER
Xt NP_001005801 IDYKQLGLRHVLFWEA QYNMAAVLCSLGRWESA E EKLKETLQG--DGRNA-KLDWALDQ
Dd AAO72634    IDYKQLGLDHKLLLA E VLFNKALALGRAGSSVALQATQCFSQPSDSQEFKN-QCKKIQDG

```

```

MG05280.4      EAEG--YTVFSIPVGVVYRPND AKVRNLKTKDYLGKARLVAASDRSNAFTGFAGSEIKNS
NCU07850      NAEG--YTVFSIPVGVVYRPNEAKVRNLKTKDYLGKARLVATSDANNAFTGFAGAEIKNA
EfNoxR        EAEG--YTVFSIPVGVVYRPNEAKVRNLKTKDYLGKARLVAASDRSNAFTGFAGSEIKNA
FG04123.1     QAEG--YTVFSIPVGVVYRPNEAKVRNLKTKDYLGKARLVAASDRANAFTGFAGSEIKNA
AN6046        RAEG--YTVFSIPVGVVYRPNEAKVKNLKT KDYL GKS RVIAANRLS---TPAD-----
Hs NP_000424   VWKQKLYEPVVI PVGRLFRPNERQVAQLAKKDYLGKATVVASVVDQDSFSGFAPLQPQAA
Bt AAC82463   VWKQKLYEPVVI PVGRLFRPNEKQVAQLVKKDYLGKATVVASVVDQDSFSGFAPLQPQAA
Mm NP_035007   IWKQKLFEPVVI PVGRLFRPNERQVAQLAKKDYLGKATVVASV VHQDNFSG FAPLQPQSA
Gg XP_422288   I LKQKLYEPVAIPTGK LFRPNEKQVAQLEKKDYLGKAMVVASVVDKDSFSGFAPLQPQAS

```

Xt NP\_001029119 ILKEKVFAAVKIPKGRIFQPNERLVEQLEKKDYL GKALVVASVVDKDSFSGFAPLQPQAS  
Dr XP\_690944 ILKHKLFPLVEVRARLLFKPNKYVAELEKRDYLGKAKVVASVVPADDFSGFAPLQPQID  
Tr BAC79221 TLKQKLFKLGIFPSKVLFPKNKHVVAELEKDYLGKAKVVASVVPDEFSGFAPLMPQVE  
Hs AAI10841 VQRGSLPPRQVPRGVEVFRPHRWHLKHLEPVDFLGKAKVVASAI PDDQGWGVRPQQP---  
Mm AAN75143 VQKQVPLQLQQVPKGEVFP PPRRYLKHLEPMDFLGKAKVVASVVPDDH--NAQFQQ----  
Bt XP\_601452 VQKQVPLQPRQVPRGVEVFRPHRRHVEHLEPVDFLGKAKVLASALPTDS-HGVAPPQPQAL  
Gg XP\_415555 VQNHQFLEPMQVPPGFEFFRPRKKEVEQLDSKDFLGKPKVISSIPNDEYIGFEPLRPQKQ  
Xt NP\_001005801 VQRSSLQPMSVPEGEFFRPRKQVEVQLNSVDFLGKPTVISSVVPNDQYSGFEPLRPQQP  
Dd AA072634 SQLN--FSTRPIPLSLLFKPPK--VSDAPQKQRSATTSSIQSSSPSTPMSSSSPPSYILKG

MG05280.4 GKADVVD-DRPSDNISFAATNLVKPGLQSRARQQSEPPNSRNVFPPTPPPDKQTMSSRG  
NCU07850 GKLEVKD-DRPVELSFAATNLVKPGLQSR-RQQSEPTNRSMFPPPTPPENEKSSQMSRG  
EfNoxR GKMEVKD-DRPADNISFAATNLVKPGIQSR-RQQPEPSANRNVFPPTPPDNDRP--SRG  
FG04123.1 GKLEVKD-DRPADNISFAATNLVKPGLSSR-RQQSEPPNGRNVFPPTPPENERP--SRA  
AN6046 ----TS--QRSVDSVPFATSHLVQKNLTSRSRQQSEPPMHRNLFPPPTPPDADKASLSST  
Hs NP\_000424 EPPPRPK-TPEIFRALEGEAHRVLFVGFVPEETKEELQVMPGNIVFVLKKGNDNWTVMFNG  
Bt AAC82463 EPPPRPK-TPEIFRALEGEAHRVLFVGFVPEETPEELQVMPGNIVFVLKKGNDNWTVMFNG  
Mm NP\_035007 EPPPRPK-TPEIFRALEGEAHRVLFVGFVPEETPEELQVMPGNIVFVLKKGNDNWTVMFNG  
Gg XP\_422288 GPPPRPK-TPEILRALEGQPHRVLYEFIPETAELQVLPGNIVFVLKKEKDNWTVMFNG  
Xt NP\_001029119 NPPPRPK-TPEILRTLQEGEPHRVLFVFNPEETAEMQVLPGNIVFVLKKGDDNWTVMFNG  
Dr XP\_690944 NVPSIPK-VPEVLRVLEGEPTHVLYEFVPEETKEELAVLPGNIVFVLHRTDNWASVVFNE  
Tr BAC79221 SGQTFSKPEPELLRALEGEPTHVLYKVFPEETSDDELAVVPGNVFVLQKGDNDWASVVFNE  
Hs AAI10841 -----Q---GPGANHDARSLIMDSPRAGTHQGPLDAETEVDGADRCTSTAY-----QEQR  
Mm AAN75143 -----RSQAEHAG-----HQ-----PSSSMCKRVLSTTG-----GHTS  
Bt XP\_601452 ----DVR---GEARPRAAARADTAPGRADTPCSPRTPTDTEMEVSSQAR-----QHDR  
Gg XP\_415555 GFYEPSA---DSVRDRESGYRVLVSHYYPEGTEKLAVKASSLVFVLARGANGWATAIHDG  
Xt NP\_001005801 GFYEPFCR---DAMQCREAGYHRVVVHYYPENSNEVAVKANSVLFVLNKGDD-WATAIHDG  
Dd AA072634 PSSPSSSSPSSSSPSSLSSSSSPKLPPTPKPSFGSSPPSSSSSSSSSSSSSSSSSISPLT

MG05280.4 AS---VRN--GPKPMPAKLNIDKARPNDRYERTTSP-----QEQRSRAPSRAPSNAPSRSR-  
NCU07850 AS---VRN--GPKMPARLNLDKVRPSDRYEKTSP-----EEPSRRPSRAASATPSRSR-  
EfNoxR SS---VRN--GSRPMPAKLTIQTQDSNRKYEKAPS-----PEEVRATRASAASSTPSQ-  
FG04123.1 AS---VRN---QKPOLAKLNIQQAEPNRRYEKAAS-----PADARRP-MPRSASTTR-  
AN6046 GSGNTVRAQPGKAQRPPKLDLDRPGAQPAGRSTTDL-----TAPEKPRLGTIRTASEPR-  
Hs NP\_000424 QK---GLV---PCNYLEPVELRIHPQQQP--QEE-----SSPQSDIPAPPSSKAPGR-  
Bt AAC82463 QK---GLV---PCNYLEPVELRIHPQQQP--QEE-----TSLES DIPAPPSSAPGR-  
Mm NP\_035007 QK---GLV---PCNYLEPVELRIHPQSQP--QED-----TSPESDIPPPNSSPPGR-  
Gg XP\_422288 KK---GIV---PCNFLEPMEL--QHKLHV--QDE-----APLEPDIPEPPSTAPRP-  
Xt NP\_001029119 KK---GIV---PCNYLEPVELRFQSAQQTGVQSEELDSPTNRPQSDVPAPPDATPPQL-  
Dr XP\_690944 KR---GLV---PYNFLEPLDIVTMTSKPTEALNE-----NDDIPAPPRRAAPS--  
Tr BAC79221 RR---GLV---PYNLERLEIT-MASKQNNVQSR-----PPSRQPPTRPERKSG-  
Hs AAI10841 PQ---VEQ---VGKQA-----PLSPGLPAMGGPGPGP--  
Mm AAN75143 P-----GLYDSSLASRRPGPGP--  
Bt XP\_601452 GT---LVT---HKSAGHEHA-----G-----QQLPSGLLAAGGPPSPGS--  
Gg XP\_415555 QK---LHI---PTSLLEPAS--KMDKWKI--GDG-----IPLPPAQVPPSRLHVQK--  
Xt NP\_001005801 QK---ILI---PTSFLEPTNPPKADIKKM--NNG-----IPLPPMKTPTPRNVRPGM  
Dd AA072634 NKTLPKPPPLPSKKLPSRPISCVIQDVKITLKVIFYKDR--RLIQIPVPCNLSTFIQKIE

MG05280.4 -----GFSTRE-----PPRRRPR  
NCU07850 -----GFSQREQ--P-----PPRMRRS  
EfNoxR -----GFSRRD-----HPPIQRRP  
FG04123.1 -----TPLQRE-----PPPLQLRP  
AN6046 -----GQSRQPR--G-----YAPERHVR  
Hs NP\_000424 -----PQLSP-----GQKQKEE  
Bt AAC82463 -----PQLSP-----GQKQKEE  
Mm NP\_035007 -----LQLSP-----GHKQKE-  
Gg XP\_422288 -----RRPAPDCVPV-----TSTQQREA  
Xt NP\_001029119 -----LKNTKD-----KQDFSAS  
Dr XP\_690944 -----RPVAP-----EGLKTVN  
Tr BAC79221 -----LPCCA-----DDRRNTQ  
Hs AAI10841 -----CEDPAG-----AGGAGAGG  
Mm AAN75143 -----SEVSSG-----SEGAAATK  
Bt XP\_601452 -----SSEAS-----TGAAPGR  
Gg XP\_415555 -----TPDSPG-----EENV SAND  
Xt NP\_001005801 EPLTGVAQAGAPVPPQAGAAEPYKIKALPVGMEPIVEVAVPVQRSVPTHKETGNVPLGN  
Dd AA072634 LKFEITISDKFSLSFQLD-----GEENEIN

MG05280.4 SQ-----EEEEGYL-----DDVDNYGGGIGG

NCU07850 QQ-----EEDSY-----SELYDMYGG--PG  
EfNoxR TRR-----IDEMEEADA-----GDLYDMYQGS-GS  
FG04123.1 KQ-----IPEETGSP-----EDVYAMYSAT--D  
AN6046 SSD-----GYGHRRGAS-----DHGFGVSNHGSDD  
Hs NP\_000424 PK-----EVKLSVP-----MPYTLKVHYKYTVV  
Bt AAC82463 PKQ-----EIKLSVP-----KSYTLKVHYKYTVV  
Mm NP\_035007 PK-----ELKLSVP-----MPYMLKVHYKYTVV  
Gg XP\_422288 SKPNSLCCE---SREKPDTPHHLQSESEPDIP-----KPYVLKVHYKYTVV  
Xt NP\_001029119 SKQ-----K-----LQETEAVAV-----ASYLVKVYKYTVV  
Dr XP\_690944 AK-----VQEFSG-----CVVKVHFQFTIA  
Tr BAC79221 MK-----ESELADD-----S-CVVKVRYTFTFA  
Hs AAI10841 SEP-----LVTVTVQCAFTVA  
Mm AAN75143 PES-----LVTVTVQCHFTVP  
Bt XP\_601452 SES-----LATVTVQCALTLS  
Gg XP\_415555 SGSQVDFES-----PLTHREASS-----STDRPAVLVRCECTVV  
Xt NP\_001005801 DASLVEDAGRTIIKPKGESAPEPGFPTRQTGPDNGPMATPVPTDDDKLVLVSHAEFTVN  
Dd AA072634 SQVQLDKMICMEINEINVKDIIPSPSPSPSPSPDKTN-----NSTSSYSSSSSSSSSS

MG05280.4 GGSIRGSR-----SQRRAPQORYIEEDE---GSDFDGSGFDEGDFEMVSNRRPPTNS  
NCU07850 PNRNSRGQR-----SNRSAP--RYIQEEDD---ESDYD-VSFDEAEFEMVSGRRPSLST  
EfNoxR NRRTSRDSRRP-----SVRSRTQPRYYDD-DD---GSDYDDGSLDGAEFEMVSNRRRQGS  
FG04123.1 GYRNSRGSAG-----SRRLRPQ-QYSEE-ED---ASDYE-GTINENDFEMIGQRR-GPGS  
AN6046 AYGMYGEARAMTLANGRRPFQOQGYIDEEYEG-SSPCDELDVPDASFELMGSRP-RARS  
Hs NP\_000424 MKTQFGLPYS-----QVRDMVSKKLELRLEHTK--LSYRPRDSNE--LVPLSEDSMKDAW  
Bt AAC82463 METQFRLPYS-----QVRDMVAKKLDLLPEHTK--LSYRRQDSNE--LVPLSEFSMKDAW  
Mm NP\_035007 METRLGLPYS-----QLRNMVSKKLALSPEHTK--LSYRRRDSHE--LLLLSEESMKDAW  
Gg XP\_422288 MQVKPDLISKY-----ELLGLVCDKLELQPEHTM--LRYKSAASGE--LVPLSAQNLEEAW  
Xt NP\_001029119 IQISSKLPFA-----DLLTLISSKQLLPSRMK--LSFKEDQDD---VLLNEENTEKAW  
Dr XP\_690944 IAIAHGQPYG-----VILQMISSKLLPASTLT--LRYAKEGSAE--RVIIEDSEMEAVW  
Tr BAC79221 ILVPRGSSYA-----TLAEKISEKLSVAPANAIV--LSLSSEATEQ--NVIDGGTDMEGVW  
Hs AAI10841 LRARRGADLS-----SLRALLGQALPHQAQLGQ--LSYLAPGEDGHWPPIPEESLQRAW  
Mm AAN75143 LKVRPRTGLS-----SFQTLAQAALLHQTQTGQ--LSYKAPGEERSWIPISTEESLQSIW  
Bt XP\_601452 LTAPRGADLS-----SLRALMSQALPPHAQRAQ--LSYQDPSDGRWVPLSGEALQRAW  
Gg XP\_415555 VRAGEVPSVP-----ALRALLRERFQQAERGR--LSYRHL-DGKELGAVSGEEDLEKMW  
Xt NP\_001005801 MTFVSKAITYP-----ELQALREELRKHGEQMANHLSYRDP--ESRGLTPVTGSKDWQEV  
Dd AA072634 SSSSSSSSYDNKPKSSFIKPTTRPILPPTTTTSTSTSNFNRNATLPKFKGSTPSSPSF

MG05280.4 MSSSS-RG-----QSRRPDIRNIKVKVHYT-----A-TDDTRMILIG-----  
NCU07850 VRSSGGRG-----SSRRPELRSIRVKVH-----AGDVRVIMVG-----  
EfNoxR RSES--RA-----TSRRPEIRKIRVKVH-----AGDVRVIMIG-----  
FG04123.1 VSGS--R-----NSRRTEVTKIRVKVH-----ADEVKLIMIT-----  
AN6046 CSRGPARG-----YSRRPEVRRFRVKVHS-----FEDTRYILIP-----  
Hs NP\_000424 GQVKN-----YCLTLWCENTVGDQGFDPDEPKESEKADANNQTEPQLKKS  
Bt AAC82463 AQVKN-----YCLTLWCENTVGDQGFDPDEPEESKSDANNQTEPELKEGS  
Mm NP\_035007 GQVKN-----YCLTLWCEHTVGDQGLIDEPIQRENSDASKQTEPQPKEGT  
Gg XP\_422288 SHSKD-----QCLTVWCDCTEGE-GFLPDSKPEEPQAAAETG-P-----T  
Xt NP\_001029119 SLATD-----NCLKLCCTEVQVEEPIIKVEEVQVQOEIPASDK-----AET  
Dr XP\_690944 NSAKD-----GRLTLWCSTVTEG-----KSASHAK-----  
Tr BAC79221 SRVSG-----RCITLWCRLAQTN-----E-----RVQKES-----  
Hs AAI10841 QDAAACP-----RGLQLQCRG-----AGGRPVLVYQ-----  
Mm AAN75143 RNVVPGP-----GGLQLQCG-----VWGRPVLVYQ-----  
Bt XP\_601452 RDAAG-P-----GGLQLQCRG-----VWGRPVLVYQ-----  
Gg XP\_415555 QQLTD-----GRITLCCQSDS-----HSGRPILYR-----  
Xt NP\_001005801 KLSRA-----NQVTLCCKETTL-----CAGRPVLVYR-----  
Dd AA072634 SSPSSSSSGGGGPPIPTRGSPSISLLKQQNQTSIN--IPPKVPTSSRPKMTQS-----

MG05280.4 MACEYSDFVEKIRNKFKIASRRSVRIKVRDDED-GGTMITMGDQDDLDMAIMASKSMARR  
NCU07850 TAIEFPDFEEEKIRSKFGIRRR--IKIKIKDDSDPDGDMITVGDQDDLMLIQTVKQNARK  
EfNoxR AAIEYPDFVDRIKDKFGMKRR--FKIKIPDEDMPDGDMITVGDQDDLMAIQSSTSLAKR  
FG04123.1 PDTRFETLSDKVRDKFNIRKRR--FKIKIKDDSDPDGDMITVGDQDDLMAIQSSTSLAKR  
AN6046 PTIEFAEFETRIREKFGFQMA--LKIKMQDE---GDMITMVDQEDLDLLMASREIARR  
Hs NP\_000424 QVEALFSYEATQPEDLEFQEGDILVLSKVN---EWELEGECKGKVGIFPKVFVEDCAT  
Bt AAC82463 KVVALFSYEATQPEDLEFLEGDVLVISTVN---EQWLEGECKGKVGIFPKAFVEQHPT  
Mm NP\_035007 QVVAIFS YEAAQPEDLEFVEGDVILVLSHVN---EWELEGECKGKVGIFPKAFVEGCAA  
Gg XP\_422288 QVVAQYSYEATQPEDLEFQAGDVLVLSKVN---GKRAEKVCI ECKGFTVPR--  
Xt NP\_001029119 YVTALFEYEATQPEDLPFCKGDIKILSHVS---EDWWELEGECQGRMGIFPKVFTEEQ--  
Dr XP\_690944 -VVALYSYESSTPEDLEFKQGNVITVLSKVN---DEWLEGQCNKIGIFPSSSVEPLNG  
Tr BAC79221 -LLALHSYDSSNPEDLSFHQGDRIITLLSKVN---QDWLEGEFNGNTGIFPAFVEEVP

```

Hs AAI10841      -VVAQHSYSAQGPEDLGRFGDTVDVLC EVD----QAWLEGHRDGRIGIFPKCFVVPAGP
Mm AAN75143      -VVAQYNYRAQRPELDLDFHQGDTVDVLC EVD----EAWLEGHRDGCVGIFFPKCFVVPAGA
Bt XP_601452      -VVAQHVYSAQRPELDLALQPGDTVDVLC EVD----QAWLEGHCDGHIGIFPKSFTVPAAR
Gg XP_415555      -MLAQHSYSAQGPDLFSGKGDVLDILSEVN----EDWLEGHCHNGKTGIFPKCFATQTSC
Xt NP_001005801  -MRAQYDYLAQGPADLSFQQGDLSILSEVN----GEWLEGHCHRGIGIFPKCFAQRAEG
Dd AAO72634      HSPPPSSSPLSSYSTSFQSVSSPSLSSSYNGSTSSYGGFSSSRPPPTPYQVLYTDSNEK

MG05280.4       ERSDNGKMEVWIQDA---
NCU07850        QRLETGKMEVWVQEI---
EfNoxR          QRQDVAKMEIWIFEL---
FG04123.1       QRTEGKMEIWILQL---
AN6046          EGSEMKGKMEIWVEERRMI
Hs NP_000424     TDLESTRREV-----
Bt AAC82463     TDLESTPGRV-----
Mm NP_035007     KNLEGIPREV-----
Gg XP_422288     -----
Xt NP_001029119 -----
Dr XP_690944     DPHTSAE-----
Tr BAC79221      NG-----
Hs AAI10841     RMSGAPGRLPRSQQGDQP
Mm AAN75143     YVEAMLVLGP--QPGDQN
Bt XP_601452     RA-----
Gg XP_415555     AAFF-----
Xt NP_001005801 I-----
Dd AAO72634     YYLNTETNETFWELP---

```

**Supplemental Figure 3.** Alignment of vertebrate p67<sup>phox</sup> and Nox activator 1 (NOXA1), and fungal NoxR proteins used for phylogenetic analysis (Figure 1C).
